# Supplementary material
Source: Springer Nature journal article supplement (https://www.springermedizin.de/resource/supplementary/12876_2010_458_MOESM1_ESM.pdf/9437054)

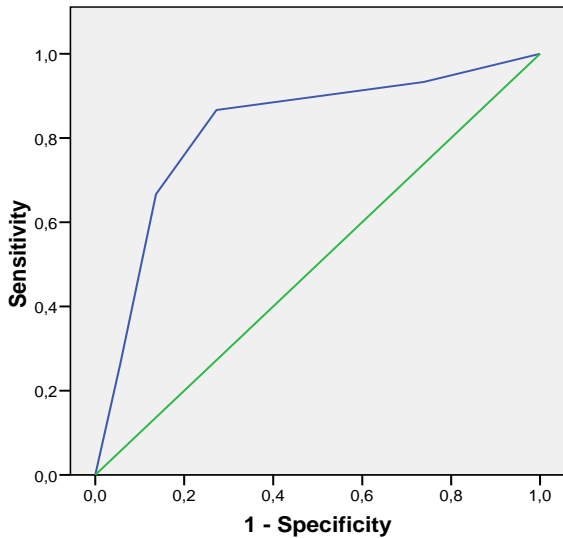

Diagonal segments are produced by ties.

Supplement: MOESM1 [file 9437054]
